# Supplementary material
Source: PubMed Central journal article supplement (PMC3858536)
Supplement: NIHMS530867-supplement-1.pdf [file NIHMS530867-supplement-1.pdf]

## SUPPLEMENTARY DATA

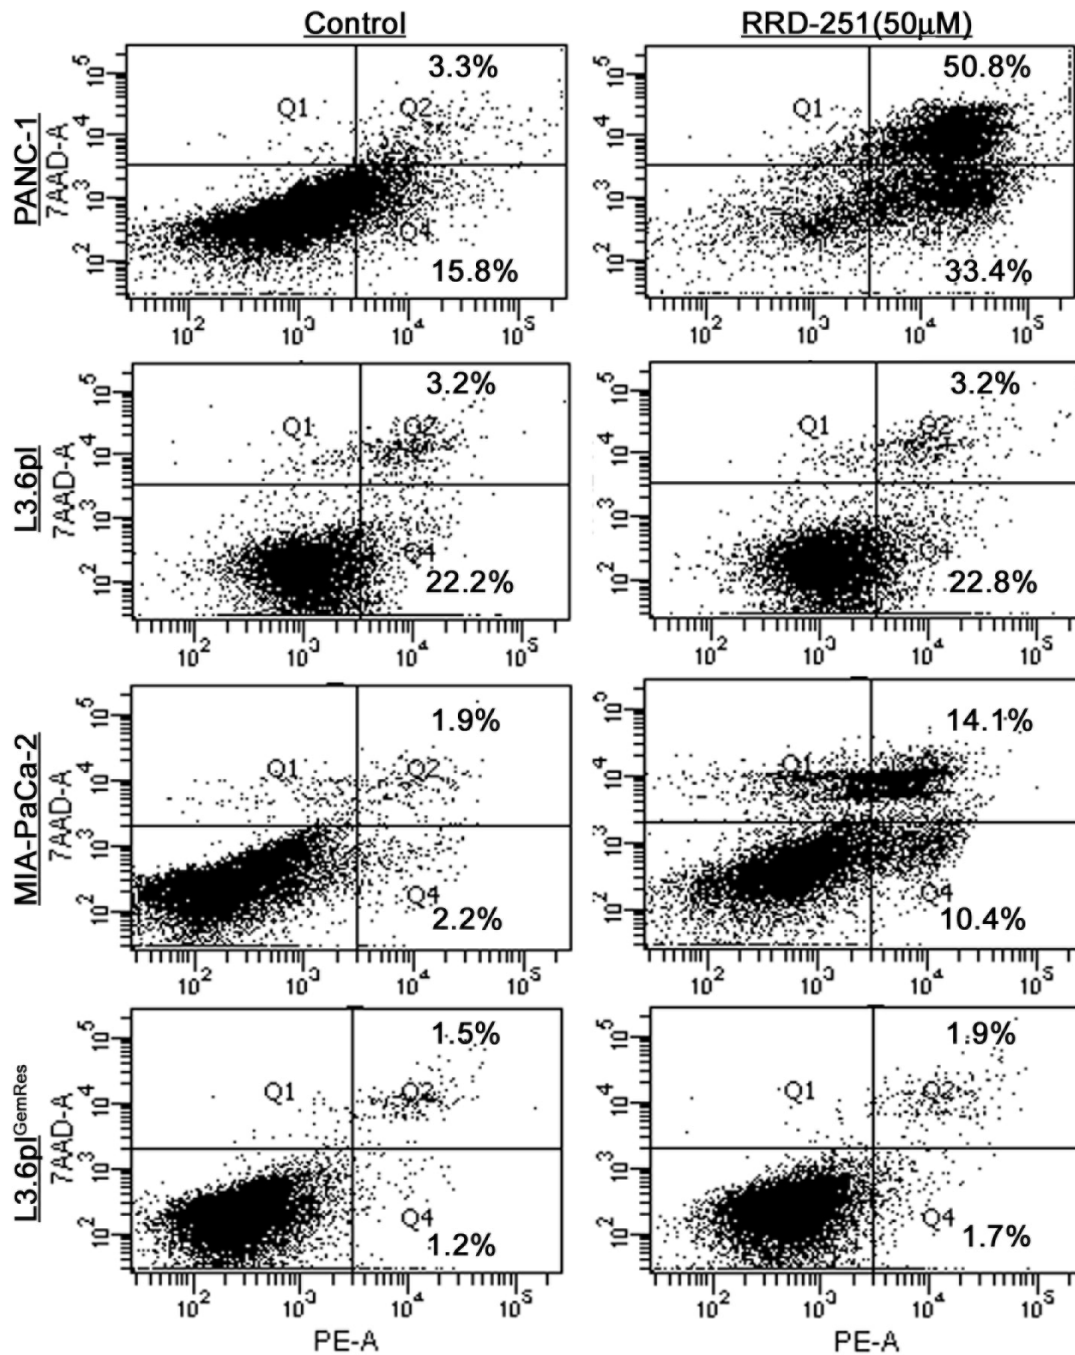

Supplementary Figure 1. PANC-1 and Mia-PaCa cells are highly sensitive to RRD-251. RRD-251 induces apoptosis in PANC-1 and MIA-PaCa2 cells but only a significantly lesser extent in L3.6pl and L3.6pl<sup>GemRes</sup> cells. Cells were treated with vehicle (DMSO) or RRD-251 for 24 hours and subjected to Annexin V staining followed by flow cytometry. RRD-251 treatment could result in significant induction of apoptosis in PANC-1 and MIA-PaCa-2 and not L3.6pl and L3.6pl<sup>GemRes</sup> cells.

SUPPLEMENTARY TABLE -1.

| No. | Cell line                | <u>% Apoptotic cells</u><br>Control | <u>%Apoptotic cells</u><br>RRD-251 |
|-----|--------------------------|-------------------------------------|------------------------------------|
| 1   | PANC-1                   | 3.3%                                | 50.8%                              |
| 2   | MIA-PaCa2                | 1.9%                                | 14.1%                              |
| 3   | L3.6pl                   | 3.2%                                | 3.2%                               |
| 4   | L3.6pl <sup>GemRes</sup> | 1.5%                                | 1.9%                               |

TABLE 1. Varying sensitivity of pancreatic cancer cells to RRD-251. Summary of the induction of apoptosis by RRD-251, as measured by Annexin staining and flow cytometry.

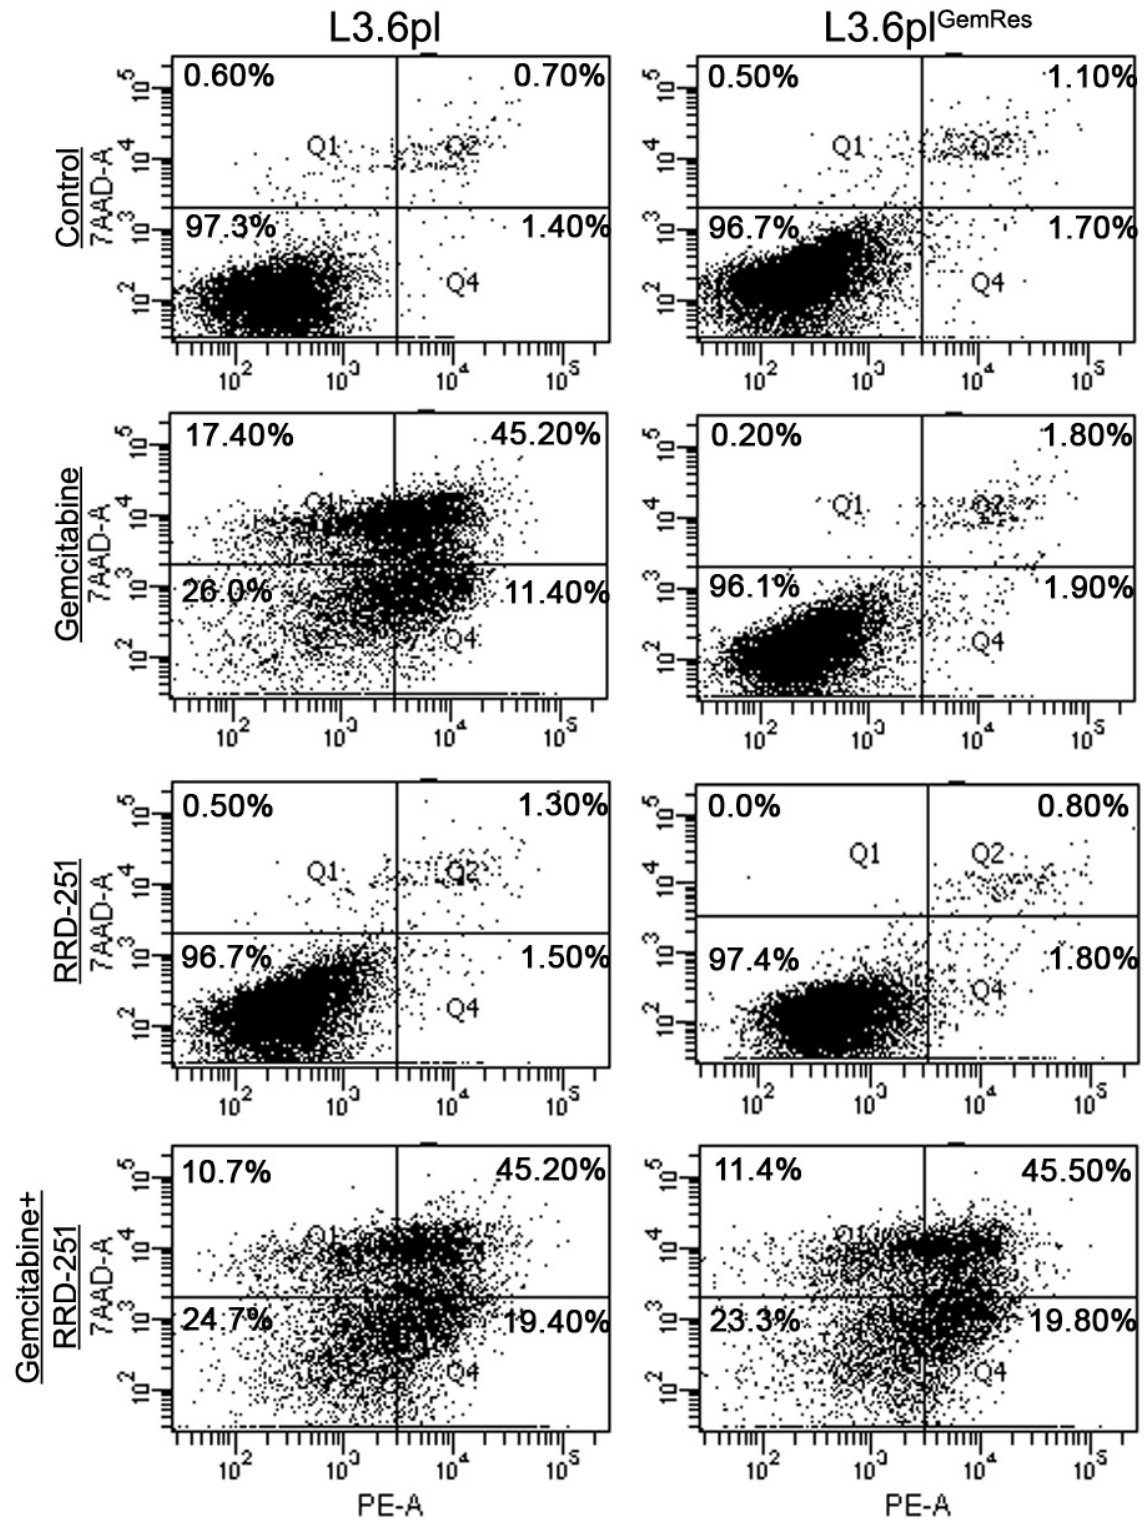

Supplementary Figure 2. RRD-251 enhances the pro-apoptotic effects of gemcitabine. Annexin V staining flow cytometry on L3.6pl and L3.6pl<sup>GemRes</sup> pancreatic cancer cells demonstrate the effects of gemcitabine, RRD-251, or in combination. Combination treatment with RRD-251 and gemcitabine significantly induced early and late apoptosis

**SUPPLEMENTARY TABLE -2.**

| No | Treatment   | <b>L3.6pl</b> |             | <b>L3.6pl<sup>GemRes</sup></b> |             |
|----|-------------|---------------|-------------|--------------------------------|-------------|
|    |             | <u>Early</u>  | <u>Late</u> | <u>Early</u>                   | <u>Late</u> |
| 1  | Control     | 1.40%         | 0.70%       | 1.70%                          | 1.10%       |
| 2  | Gemcitabine | 11.40%        | 45.20%      | 1.90%                          | 1.80%       |
| 3  | RRD-251     | 1.50%         | 1.3%        | 1.80%                          | 0.80%       |
| 4  | RRD-251+Gem | 19.40%        | 45.20%      | 19.80%                         | 45.50%      |

Supplementary Table 2: RRD-251 enhances early and late apoptosis. Percent of early and late apoptosis of L3.6pl and L3.6plGemRes pancreatic cancer cells treated with gemcitabine, RRD-251, or combination gemcitabine with RRD-251 are shown.
